# Supplementary material
Source: PubMed Central journal article supplement (PMC5777073)
Supplement: pnas.1717794115.sapp.pdf [file pnas.1717794115.sapp.pdf]

## SI Appendix

### **ALKBH5-dependent m6A demethylation controls splicing and stability of long 3'UTR mRNAs in male germ cells**

Chong Tang<sup>a,1</sup>, Rachel Klukovich<sup>a,1</sup>, Hongying Peng<sup>a</sup>, Zhuqing Wang<sup>a</sup>, Tian Yu<sup>a</sup>, Ying Zhang<sup>a</sup>, Huili Zheng<sup>a</sup>, Arne Klungland<sup>b,c</sup>, and Wei Yan<sup>a,d,2</sup>

<sup>a</sup>Department of Physiology and Cell Biology, University of Nevada, Reno School of Medicine, 1664 North Virginia Street, MS575, Reno, NV 89557, USA; <sup>b</sup>Department of Microbiology, Oslo University Hospital, Rikshospitalet, 0027 Oslo, Norway; <sup>c</sup>Department of Molecular Medicine, Institute of Basic Medical Sciences, University of Oslo, 0317 Oslo, Norway; <sup>d</sup>Department of Biology, University of Nevada, Reno, 1664 North Virginia Street, MS575, Reno, NV 89557, USA

<sup>1</sup>C.T. and R.K. contributed equally to this work.

<sup>2</sup>To whom correspondence should be addressed:

Wei Yan M.D., Ph.D.  
*University of Nevada Reno Foundation Professor*  
Department of Physiology and Cell Biology  
University of Nevada School of Medicine  
Center for Molecular Medicine, Room 207B  
1664 North Virginia Street, MS/0575  
Reno, NV 89557  
Tel: 775 784 7765  
Fax: 775 784 4362  
Email: [wyan@med.unr.edu](mailto:wyan@med.unr.edu)

This file contains SI Materials and Methods, Fig. S1-S10, and Table S1-S3.

## Materials and Methods

**Animal use and care.** All mice used in this study were on the C57BL/6J background, and housed under specific pathogen-free conditions in a temperature- and humidity-controlled animal facility at the University of Nevada, Reno. Animal use protocol was approved by Institutional Animal Care and Use Committee (IACUC) of the University of Nevada, Reno (Protocol number 00494), and are in accordance with the “Guide for the Care and Use of Experimental Animals” established by National Institutes of Health (NIH) (1996, revised 2011). The male *Alkbh5* KO mice used in this study were described previously (1).

**Histology.** Testes were dissected from WT or KO mouse and were fixed in Bouin’s solution for 24 hours, then washed and submerged in 70% ethanol until processed and paraffin-embedded using a Leica tissue processor. Sections were cut at 5µm thick and were attached to positively-charged slides (Genesee Scientific No. 29-107). Testes sections were stained with hematoxylin and eosin and staining was performed in biological duplicates or triplicates. Cauda epididymal sperm from WT or KO were spread onto positively-charged slides (Genesee Scientific No. 29-107), fixed for 5 minutes with 4% PFA, and were stained with hematoxylin and eosin to examine morphology. Images were taken using a Keyence microscope model BZX-710.

**PAS staining.** Periodic acid-Schiff (PAS) staining was performed on 5 µm thick paraffin sections. After deparaffinization, slides were incubated in 0.5% periodic acid for 10 min, followed by rinsing in distilled water three times. Slides were then submerged in Schiff’s reagent for 15 minutes followed by rinsing with distilled water for 10 minutes. Hematoxylin was used to counterstain the slides which were then dipped in 11% total volume HCL in 100% Ethanol until color was not rinsing off. Slides were dehydrated then mounted with Permount. Images were taken using a Keyence microscope model BzX-710. Staining was done in biological triplicates.

**TUNEL analyses.** Terminal deoxynucleotidyl transferase dUTP nick end-labeling (TUNEL) staining was performed according to the manufacturer’s instructions with some modifications (Trevigen *in situ* apoptosis detection kit No. 4810-30-CK). Paraffin-embedded testis sections were 5 µm thick. Proteinase K digestion was incubated at 37°C for 20 minutes and manganese was used as the cation for the TdT reaction. Slides were counterstained with hematoxylin for 15 seconds. Staining and counts were carried out in biological triplicates and the number of TUNEL-positive cells were counted from 100 randomly selected tubules. A student’s two-tailed t-test was used to determine significance ( $p < 0.05$ ).

**Gross morphology and sperm analysis.** Testis and the whole epididymis were dissected from WT and KO mice and rinsed in PBS. After weight measurements and morphology pictures were taken, both cauda epididymides were punctured several times with a needle to release the sperm into HTF medium at 37°C for 30 minutes. Computer-assisted sperm analysis (CASA) was used to analyze motility, performed in

triplicate. A hemocytometer was used to manually count sperm concentration, measured in triplicate.

**Immunofluorescence staining and confocal microscopy.** After dissection, testes were fixed in 4% paraformaldehyde for 1 hour at room temperature, poked several times with a 20.5 G needle, fixed 2 more hours at room temperature, then transferred to 4°C for 21 more hours. Testes were then washed 3x in 5% sucrose then dehydrated in a sucrose gradient of 5%:20% sucrose at 2:1, 1:1, 1:2 until testes sunk to the bottom of the tube. Testes were then kept in 20% sucrose for 48 hours and were perfused for 1 hour in 1:1 20% sucrose:OCT. Testes were embedded in a Tissue-Tek Cryomold in 1:1 20% sucrose:OCT and rapidly frozen using liquid nitrogen. Blocks were cut into 10µm thick sections on Fisher SuperFrost Plus Slides (No. 22-037-246), were allowed to dry for 30 minutes, and were stored at -80°C until use. Slides were permeabilized by boiling in citrate buffer (pH 6.0) 5 minutes, 3 times and were blocked in 1% BSA in TBS supplemented with 5% fetal bovine serum and 5% normal goat serum at room temperature for 1 hour. Primary antibodies were diluted in 1% BSA in TBS: rabbit anti-alkbh5 (Sigma No. HPA007196, 1:150), mouse anti-GM130 (BD Biosciences No. 610822, 1:200), mouse anti-SC35 (No. ab11826, 1:500) and were incubated overnight at 4°C. After washing three times in PBS, the secondary antibody was diluted in 1% BSA in TBS: goat anti-rabbit Alexa Fluor 488 (Thermo Fisher No. A11034, 1:500) and goat anti-mouse Alexa Fluor 594 (Abcam No. ab150116, 1:400) and was incubated for 1 hour at room temperature. Slides were then washed three times in PBS, followed by submersion in 0.1% Sudan Black B in 70% ethanol. After washing three times in PBS, slides were mounted using DAPI (Abcam No. ab104139). An Olympus FV1000 confocal microscope was used to take the images of z-stacks 5µm thick.

**Western blots.** Total protein lysates were extracted from whole testis in phosphate-buffered saline. The Pierce BCA Protein Assay Kit (Thermo Fisher, Cat#23225) was used to determine concentration. Protein (25 µg) was loaded and run on a 4-15% Mini-PROTEAN TGX Stain-free gel (Bio-Rad No. 456-8084), transferred onto a nitrocellulose membrane (0.45µm, Amersham, Cat#10600003) and blocked with Thermo Fisher Superblock for 1 hour. Primary antibodies: rabbit anti-Alkbh5 (Sigma HPA007196, 1:500) and mouse anti-β-actin (Abcam, Cat#ab8226, 1:5000) were incubated overnight at 4°C. Secondary antibodies: goat anti-rabbit HRP (Abcam, Cat#ab205718) and goat anti-mouse HRP (Southern Biotech, Cat#1030-05) were diluted 1:10,000, the membrane was washed, and StrepTactin-HRP (Bio-Rad, Cat#161-0376) was used to visualize the standards. Advanta Western Bright ECL Kit (Cat#K-12045-D20) was used for detection on the Bio-Rad ChemiDoc imager.

**Purification of spermatogenic cells.** Pachytene spermatocytes, round and elongating/elongated spermatids were purified from adult mouse testes using the STA-PUT method (2). The BSA gradients (0.5-4%) were prepared in the EKRB buffer (Cat#K-4002, Sigma), supplemented with sodium bicarbonate (1.26g per 1L), L-glutamine (0.29228g per 1L); Penicillin and Streptomycin mix (Thermo-Fisher, 10,000U per 1L), MEM non-essential amino acids (Thermo-Fisher, 1ml 100X per 1L), MEM amino acids (20ml 50X per 1L) and cycloheximide (100ng/ml), pH7.2-7.3). Eight testes

were pooled each time for cell purification. After being removed and decapsulated, testes were placed into 10ml of the EKRB buffer containing 5mg collagenase (Sigma) for a 12-min digestion at 32°C to disperse the testicular cells. Once dispersed, the testicular cells were washed three times using the EKRB buffer followed by trypsin digestion by incubation in 10ml EKR buffer containing trypsin (Sigma, 0.25mg/ml) and DNase I (Sigma, 20mg/ml) at 37°C for 12min with occasional pipetting to facilitate cell dispersion. Fully dispersed testicular cells were washed three times followed by centrifugation and re-suspension in 10 ml of 0.5% BSA. The cell suspension was passed through 50µm filters, and the filtrate was saved for loading onto the STA-PUT apparatus for sedimentation. After 3h sedimentation at 4°C, fractions were collected from the bottom of the sedimentation chamber. A total of 30 fractions of 15 ml each were collected. After centrifugation, the supernatants were removed, and the cells in each fraction were re-suspended, and the cell purity was determined by microscopy examination based on cell morphology, as described previously (2). Fractions containing the same cell types were pooled followed by centrifugation to collect purified pachytene spermatocytes, round spermatids, and elongating/elongated spermatids. The RNA was extracted from cells by mirVana miRNA Isolation Kit (Life Technology, Cat# AM1560).

**RNA extraction.** RNA was extracted from HEK293 cells using the mirVana miRNA Isolation Kit (ThermoFisher, Cat#AM1560), according to the manufacturer's instructions. Extracted RNA quantification was done using the Qubit RNA High Sensitivity Assay Kit (Invitrogen No. Q32855) measured on the Qubit 2.0 Fluorometer (Invitrogen).

**m6A RNA immunoprecipitation.** Protein G Dynabeads (50µL, Invitrogen, Cat#10004D) were washed three times and resuspended with immunoprecipitation buffer (5mL 0.1M Sodium phosphate, 3.5mL 2M sodium chloride, 250µL 10% triton, nuclease-free water to 50mL final volume). Rabbit anti-m<sup>6</sup>A antibody (Abcam, Cat#ab151230) or normal rabbit IgG (Invitrogen, Cat#10500C) (6µg each) were added to the beads on a rocker for 1 hour at room temperature, protected from light. The beads were washed and resuspended in immunoprecipitation buffer. 200ng of RNA were heat fragmented into 200nt fragments and were added to the bead suspension on a rocker for 2 hours at room temperature, protected from light. The beads were washed, pelleted, and eluted with sodium lauryl sulfate and tween-20 for 5 minutes at 70°C. The eluate was purified with 2.2x of magnetic beads made from SpeedBeads (Sigma-Aldrich Cat#65152105050250) and run on the Agilent RNA Pico chip (Cat#5067-1513) to verify purity and RNA integrity. All immunoprecipitations were performed in triplicate. The representative results of the procedures are shown in *SI Appendix, Fig. S8*.

**RNA library construction.** Immunoprecipitated RNA (1ng) and non-immunoprecipitated RNA (300ng) were constructed into next-generation sequencing libraries (Illumina) using the KAPA Stranded RNA-Seq Library Preparation Kit (KK8400) according to the manufacturer's instructions, with some modifications. Briefly, the fragmentation, priming, and elution steps were incubated at 65°C for 3 minutes, and the adaptors and barcodes were substituted with NEBNext Multiplex Oligos for Illumina

(Cat#E7335 and E7500). Library amplification was monitored using the qPCR with the KAPA real-time library amplification kit (Cat#KK2702). All libraries were constructed in triplicate. After final amplification, libraries were size selected using magnetic beads. The eluates were quantified using Qubit DNA High Sensitivity (Invitrogen, Cat#Q32854) and the Agilent DNA High Sensitivity chip (Cat#5067-4626) was used to determine library quality. Immunoprecipitated libraries were pooled according to library quantity and their negative control counterparts were pooled with equal volume to the immunoprecipitated library. Transcriptome libraries were pooled according to quantity. All libraries were sequenced at the Genomics Center of the University of Nevada, Reno on the Illumina Next-Seq 500 using paired-end 75 sequencing.

**RNA-Seq data analyses.** Quality control of RNA-Seq data are shown in *SI Appendix, Fig. S9*. Trimmomatic was used to remove adaptor sequences, and low-quality reads from the sequencing data (3). To identify all the transcripts, we used Tophat2 and Cufflinks to assemble the sequencing reads based on the UCSC MM9 mouse genome (4). The differential expression analysis was performed by Cuffdiff (4). The global statistics and quality controls are presented in Supplemental Figure S1. The UTR and alternative splicing analyses were performed using the SpliceR pipeline (5). The sequences without identified coding frames were extracted and subjected to coding potential calculating (6). The sequencing depth and alignment ratio were listed in *SI Appendix, Fig. S10*. We performed the data mining using our in-house R script.

**Data normalization.** FPKMs counts are scaled in Cuffdiff analyses *via* the median of the geometric means of fragment counts across all libraries, as described in (7). The principle was identical to the one used by DESeq (8).

**m6a RIP-Seq data analyses.** Trimmomatic was used to remove adaptor sequences and low-quality reads from the sequencing data (3). To reduce bias from potential inaccurate gene structure annotation, we aligned the m6A-seq reads to the assembled gene sequences derived from RNA-Seq cufflink results, using Tophat v2.0.14 (4). The longest isoform was used if the gene had multiple isoforms. The peak-calling method was modified from published work (9). To call m6A peaks, the longest isoform of each gene was scanned using a 100nt sliding window with 10nt step. We add one count to all the windows to avoid 0 count in the windows. The peak height threshold was ten counts. For each gene, the read counts in each window were normalized by the median counts of all windows of that gene. A Fisher exact test was used to identify the differential windows between IP and input samples. The window was called positive if the  $\text{count} \geq 10$  and  $\log_2(\text{enrichment score}) > 0.8$ , which FDR is close to zero. Overlapping positive windows were merged. The following four numbers were calculated to obtain the enrichment score of each window: (a) read counts of the IP samples in the current window, (b) median read counts of the IP sample in all 100nt windows on the current mRNA, (c) read counts of the input sample in the current window, and (d) median read counts of the input sample in all 100nt windows on the current mRNA. The enrichment score of each window was calculated as  $(a*d)/(b*c)$ . We used HEK293 cell m6A RIP-Seq data as the control to correlate with the 2,000bp genomic range of the published m6a nucleotide resolution site (10). The enrichment

score threshold was set as 0.8 to get the best results. If the high-confident peaks were identified in two of three, we then regarded it as a true m6A peak. We performed the data mining using our in-house R script.

**Sequencing data deposition.** Both RNA-Seq and m6A RIP-Seq datasets have been deposited into the Sequence Read Archive (SRA) database in the NCBI with an accession number of PRJNA420607.

## References

1. Zheng G, *et al.* (2013) ALKBH5 is a mammalian RNA demethylase that impacts RNA metabolism and mouse fertility. *Mol Cell* 49(1):18-29.
2. Zhang Y, *et al.* (2017) MicroRNAs control mRNA fate by compartmentalization based on 3' UTR length in male germ cells. *Genome Biol* 18(1):105.
3. Bolger AM, Lohse M, & Usadel B (2014) Trimmomatic: a flexible trimmer for Illumina sequence data. *Bioinformatics* 30(15):2114-2120.
4. Trapnell C, *et al.* (2012) Differential gene and transcript expression analysis of RNA-seq experiments with TopHat and Cufflinks. *Nat Protoc* 7(3):562-578.
5. Vitting-Seerup K, Porse BT, Sandelin A, & Waage J (2014) spliceR: an R package for classification of alternative splicing and prediction of coding potential from RNA-seq data. *BMC Bioinformatics* 15:81.
6. Kong L, *et al.* (2007) CPC: assess the protein-coding potential of transcripts using sequence features and support vector machine. *Nucleic Acids Res* 35(Web Server issue):W345-349.
7. Anders S & Huber W (2010) Differential expression analysis for sequence count data. *Genome Biol* 11(10):R106.
8. Li P, Piao Y, Shon HS, & Ryu KH (2015) Comparing the normalization methods for the differential analysis of Illumina high-throughput RNA-Seq data. *BMC Bioinformatics* 16:347.
9. Zhao BS, *et al.* (2017) m6A-dependent maternal mRNA clearance facilitates zebrafish maternal-to-zygotic transition. *Nature* 542(7642):475-478.
10. Linder B, *et al.* (2015) Single-nucleotide-resolution mapping of m6A and m6Am throughout the transcriptome. *Nat Methods* 12(8):767-772.

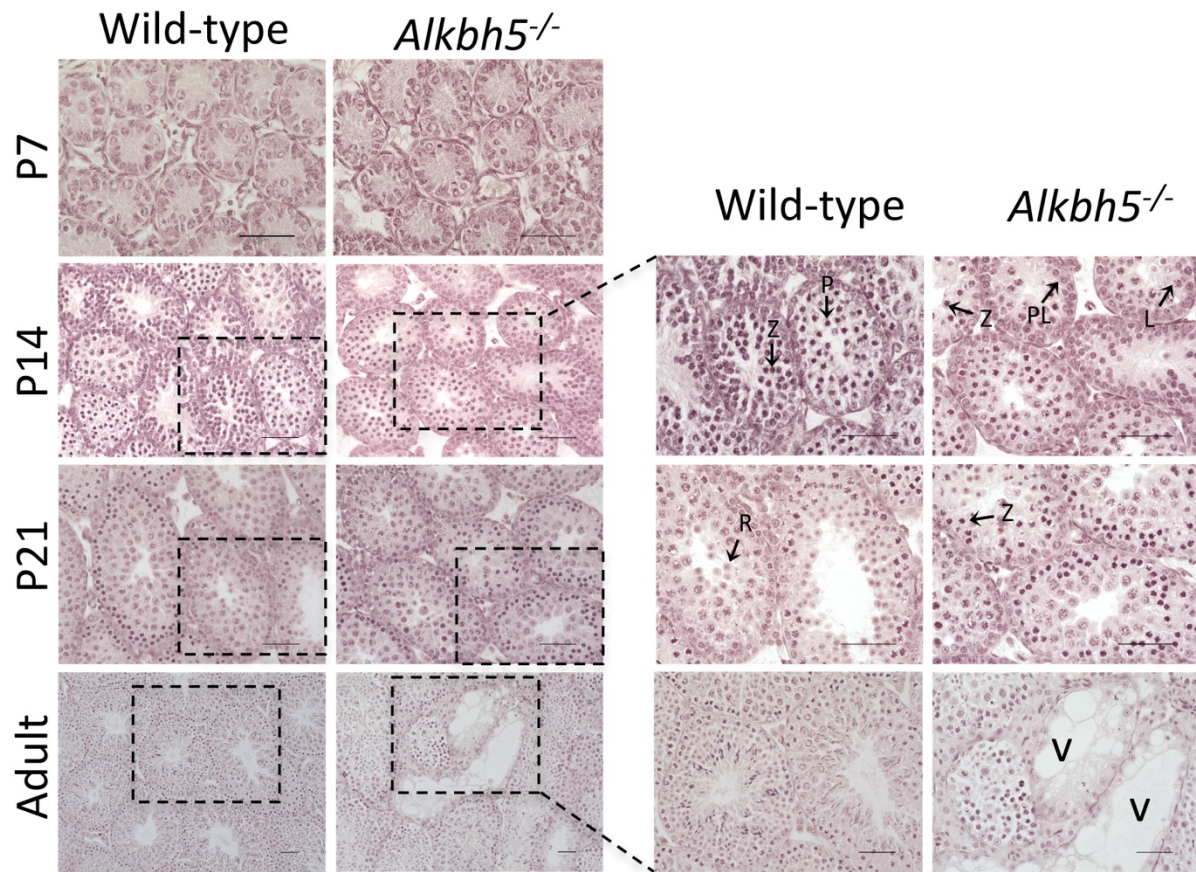

**Fig. S1. Disrupted spermatogenesis in *Alkbh5* KO testes.** Representative micrographs of hematoxylin and eosin (HE)-stained paraffin sections of wild-type (left column) and *Alkbh5*<sup>-/-</sup> (right) testis were indistinguishable at postnatal day 7 (P7). A slight delay in meiotic progression began at P14 with much fewer zygotene spermatocytes (Z) in *Alkbh5*<sup>-/-</sup> testes. At P21, round spermatids (R) already appeared in wild-type testes, but absent in *Alkbh5*<sup>-/-</sup> testes. P, pachytene spermatocytes; L, leptotene spermatocytes. Adult *Alkbh5*<sup>-/-</sup> testes lacked elongated spermatids and contained numerous vacuoles (v), indicative of massive germ cell depletion. Scale bars=50µm.



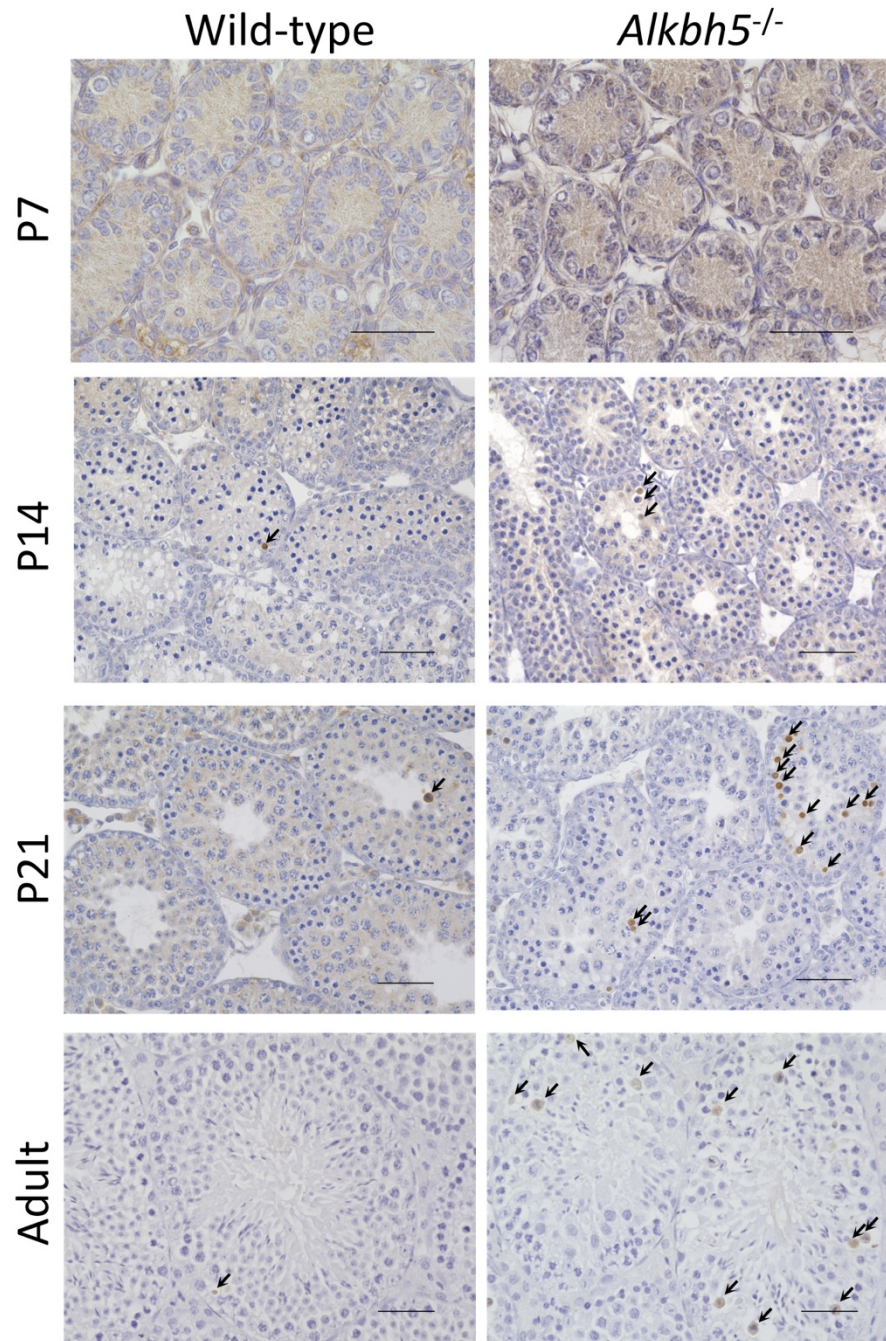

**Fig. S2. Enhanced germ cell apoptosis in *Alkbh5*<sup>-/-</sup> testes.** Terminal deoxynucleotidyl transferase dUTP nick end labeling (TUNEL)-staining followed by hematoxylin counterstaining was employed to label apoptotic cells. While no apoptosis was observed in either wild-type or *Alkbh5*<sup>-/-</sup> testes at postnatal day 7 (P7), the number of apoptotic germ cells was much greater in the *Alkbh5*<sup>-/-</sup> testes than that in WT controls. Experiments were conducted in triplicates. Scale bars=50μm.



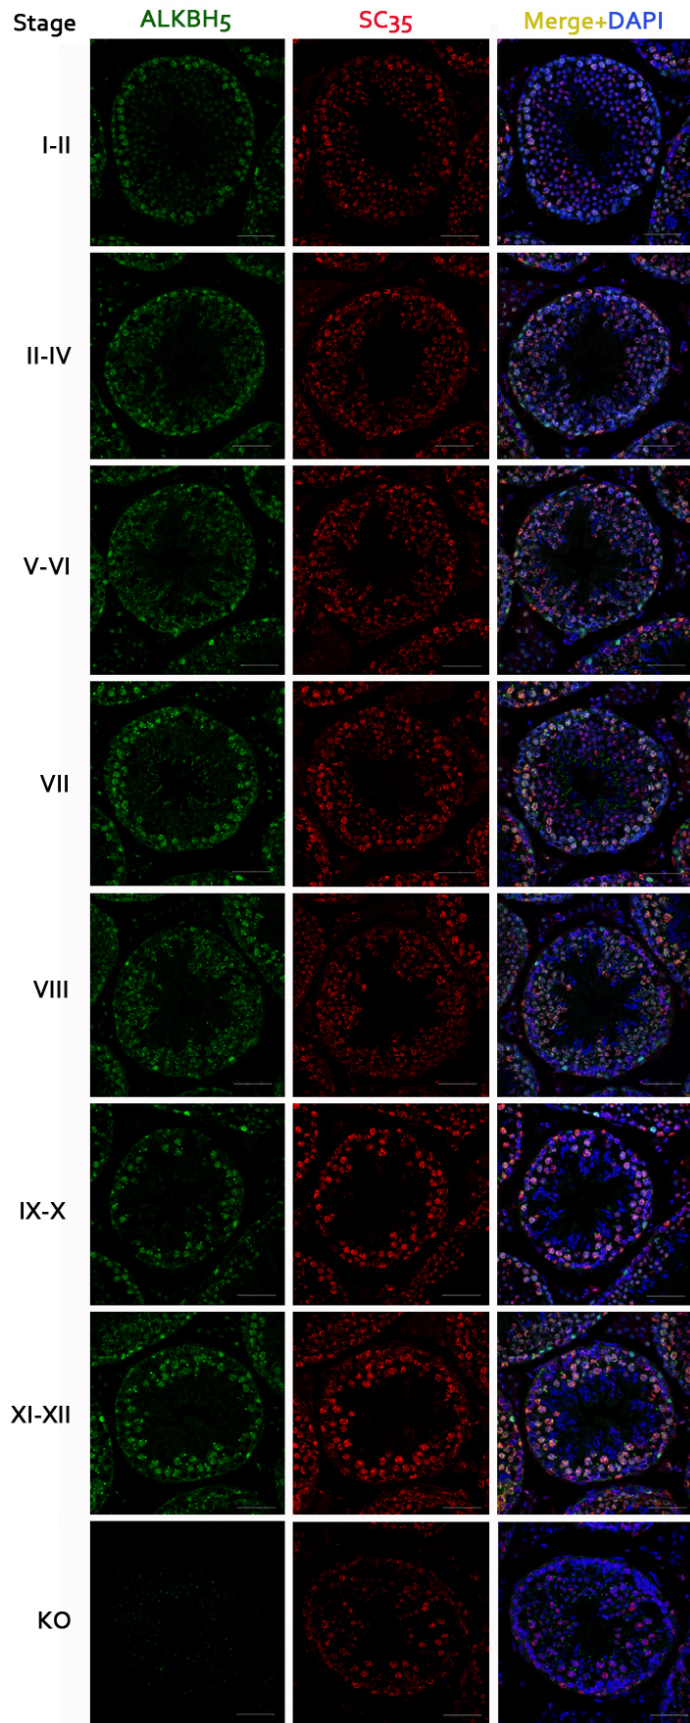

**Fig. S3.** Immunofluorescent staining of ALKBH5 (green) and SC35 (red) in WT and Alkbh5 KO testes. Representative images of twelve stages of the seminiferous epithelial cycle are shown. Scale bars = 50 $\mu$ m.

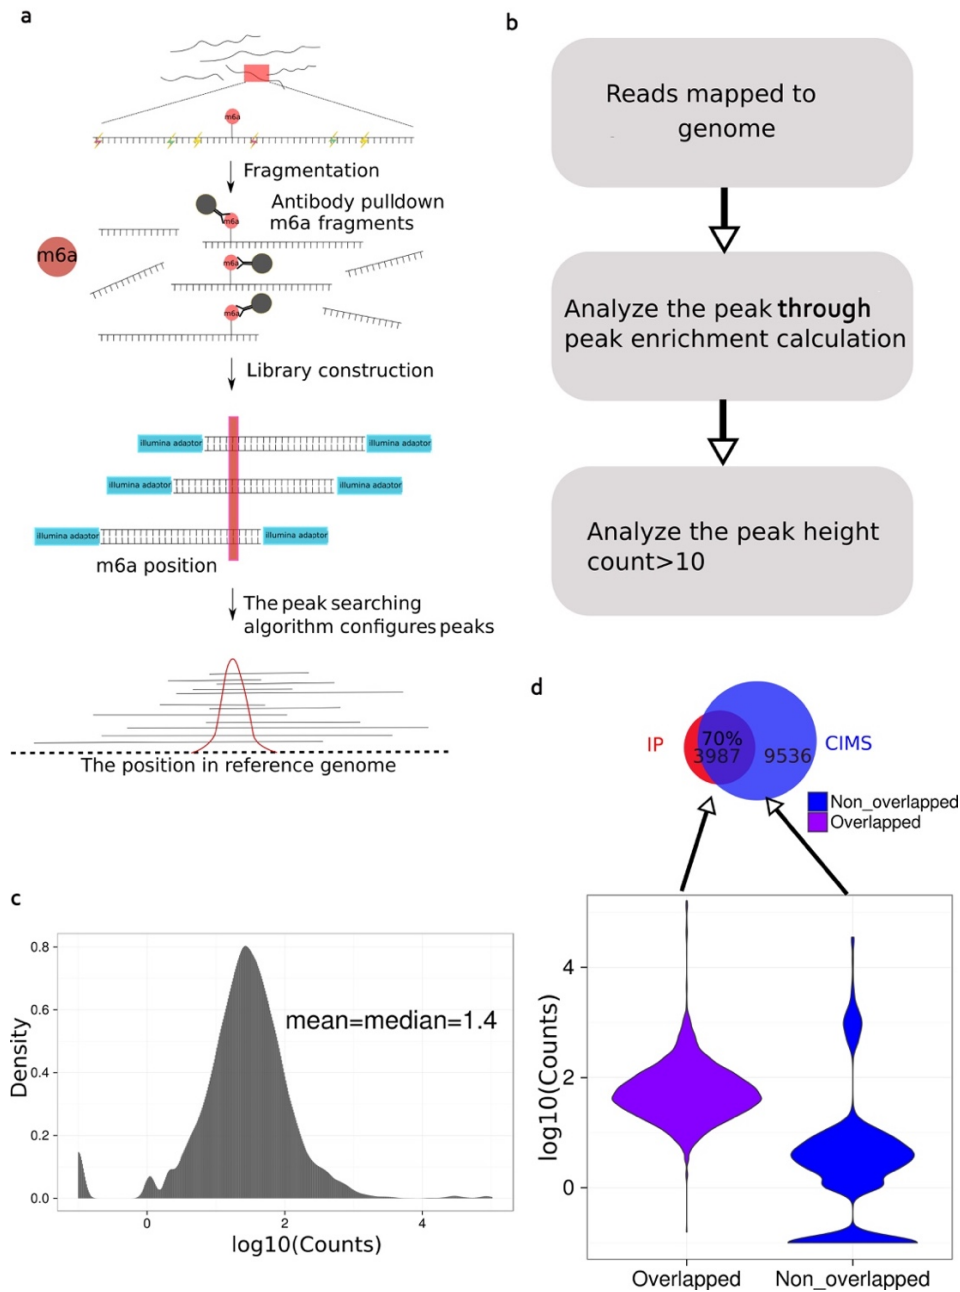

**Fig. S4. Validation of the m6A RNA immunoprecipitation followed by deep sequencing (m6A-RIP-Seq) method using HEK293 cells.** a. Total RNA was fragmented followed by IP using the m6A antibodies. Sequencing reads should peak around the m6A sites. b. Workflow for calculating the peak enrichment score and height. c. Density plot showing the distribution of m6A reads. d. After data training and proper parameter cutoff, our m6A-RIP-Seq method could detect ~70% of the m6A sites previously identified in HEK293 cells using a similar method<sup>1,2</sup>.

#### References

1. Dominissini D, *et al.* Topology of the human and mouse m6A RNA methylomes revealed by m6A-seq. *Nature* **485**, 201-206 (2012).
2. Meyer KD, Saletore Y, Zumbo P, Elemento O, Mason CE, Jaffrey SR. Comprehensive analysis of mRNA methylation reveals enrichment in 3' UTRs and near stop codons. *Cell* **149**, 1635-1646 (2012).

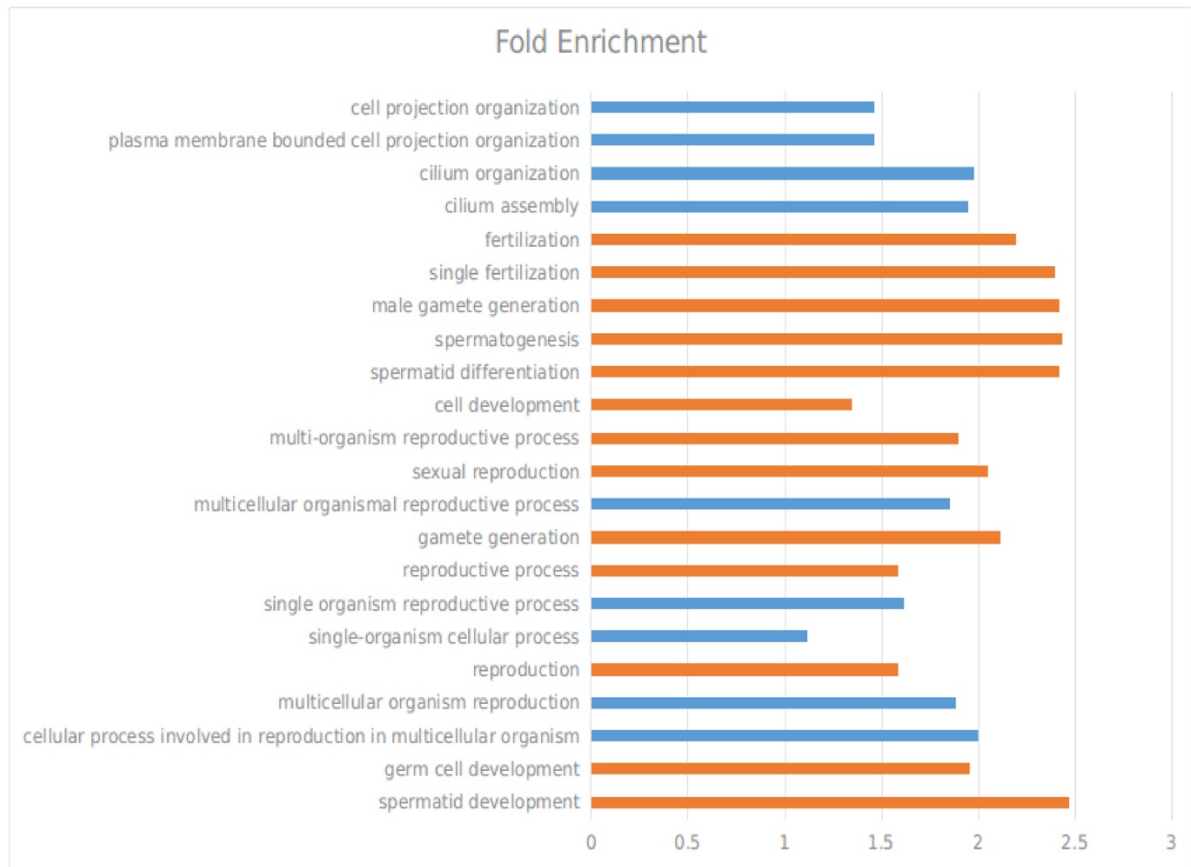

**Fig. S5. Gene ontology analyses of 30 longer 3'UTR (>3,000nt) transcripts that are normally expressed in WT round spermatids, but downregulated in *Alkbh5* KO round spermatids.** These mRNAs are mostly involved in the control of spermatogenesis and male fertility.

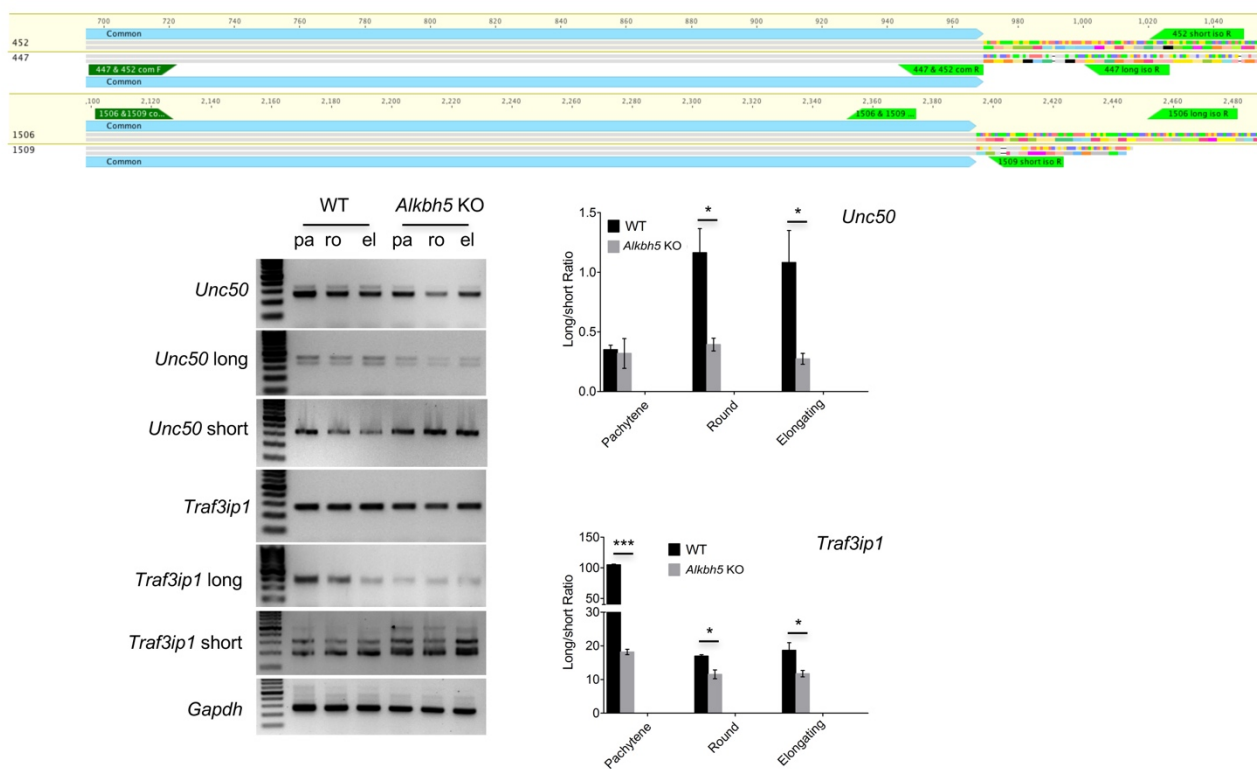

**Fig. S6.** qPCR analyses of expression levels of *Unc50* and *Traf3ip1* in WT and *Alkbh5* KO pachytene spermatocytes (pa), round (ro) and elongating (el) spermatids. Primer locations are shown in upper panels, and the primer sequences are listed in the table below. *Gapdh* was used as an internal control.

| Primer                              | Sequence (5'→3')               |
|-------------------------------------|--------------------------------|
| <i>Gapdh</i> F                      | ACAGTCCATGCCATCACTGCC          |
| <i>Gapdh</i> R                      | GCCTGCTTCACCACCTTCTTG          |
| <i>Unc50</i> (447 & 452 com) F      | GGTGTGGCCTTCTGATCTCAACGTTA     |
| <i>Unc50</i> (447 & 452 com) R      | CACTGTATCCCAGGAAGGTACATAG      |
| <i>Unc50</i> (447) short iso R      | CATGAGAGGTGCGAATGGATAGAGCA     |
| <i>Unc50</i> (452) long iso R       | CATATGAGTGAACCATAACACCTCAGGCA  |
| <i>Traf3ip1</i> (1506 & 1509 com) F | CAGGAGCAGAGTATCACAGACAGTGC     |
| <i>Traf3ip1</i> (1506 & 1509 com) R | AGCAGGCCATTTCTCAGCAGACT        |
| <i>Traf3ip1</i> (1506) long iso R   | CTGGAGGCTCTAAGTAGTAAGCACTGTAGC |
| <i>Traf3ip1</i> (1509) short iso R  | ACTGTCCTCTCCAACCGAGAC          |

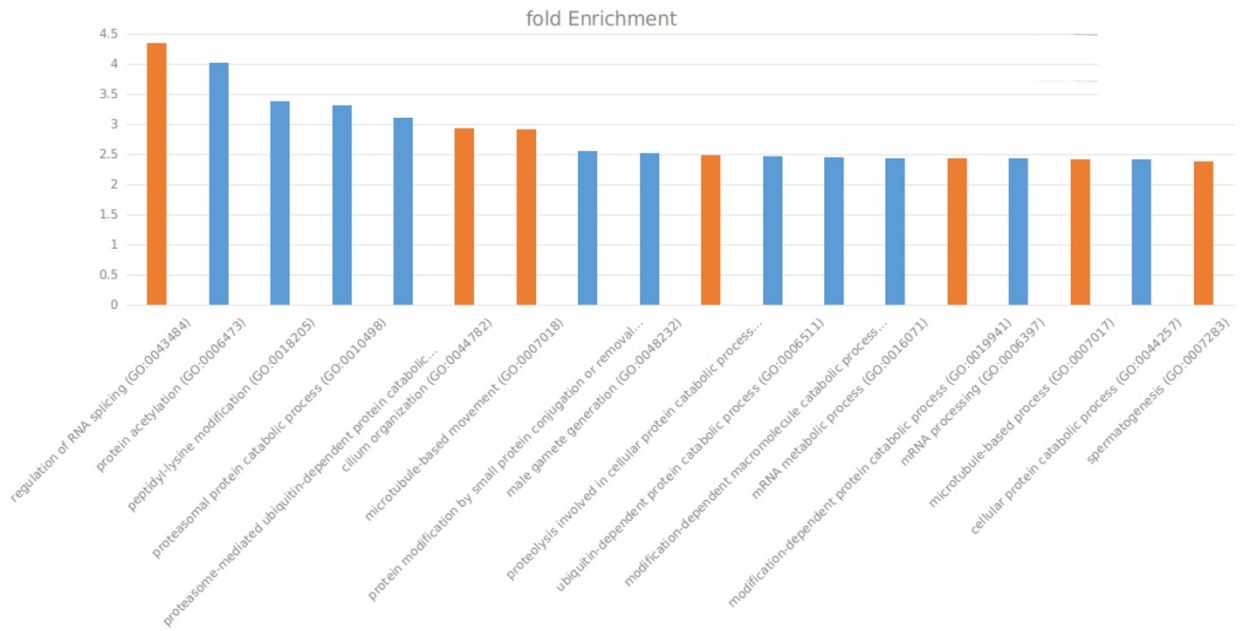

**Fig. S7. Gene ontology analyses of the shorter transcripts that quickly degrade in *Alkbh5* KO elongating spermatids.** Note that many of these short mRNAs are involved in the regulation of RNA splicing, protein and mRNA metabolism.



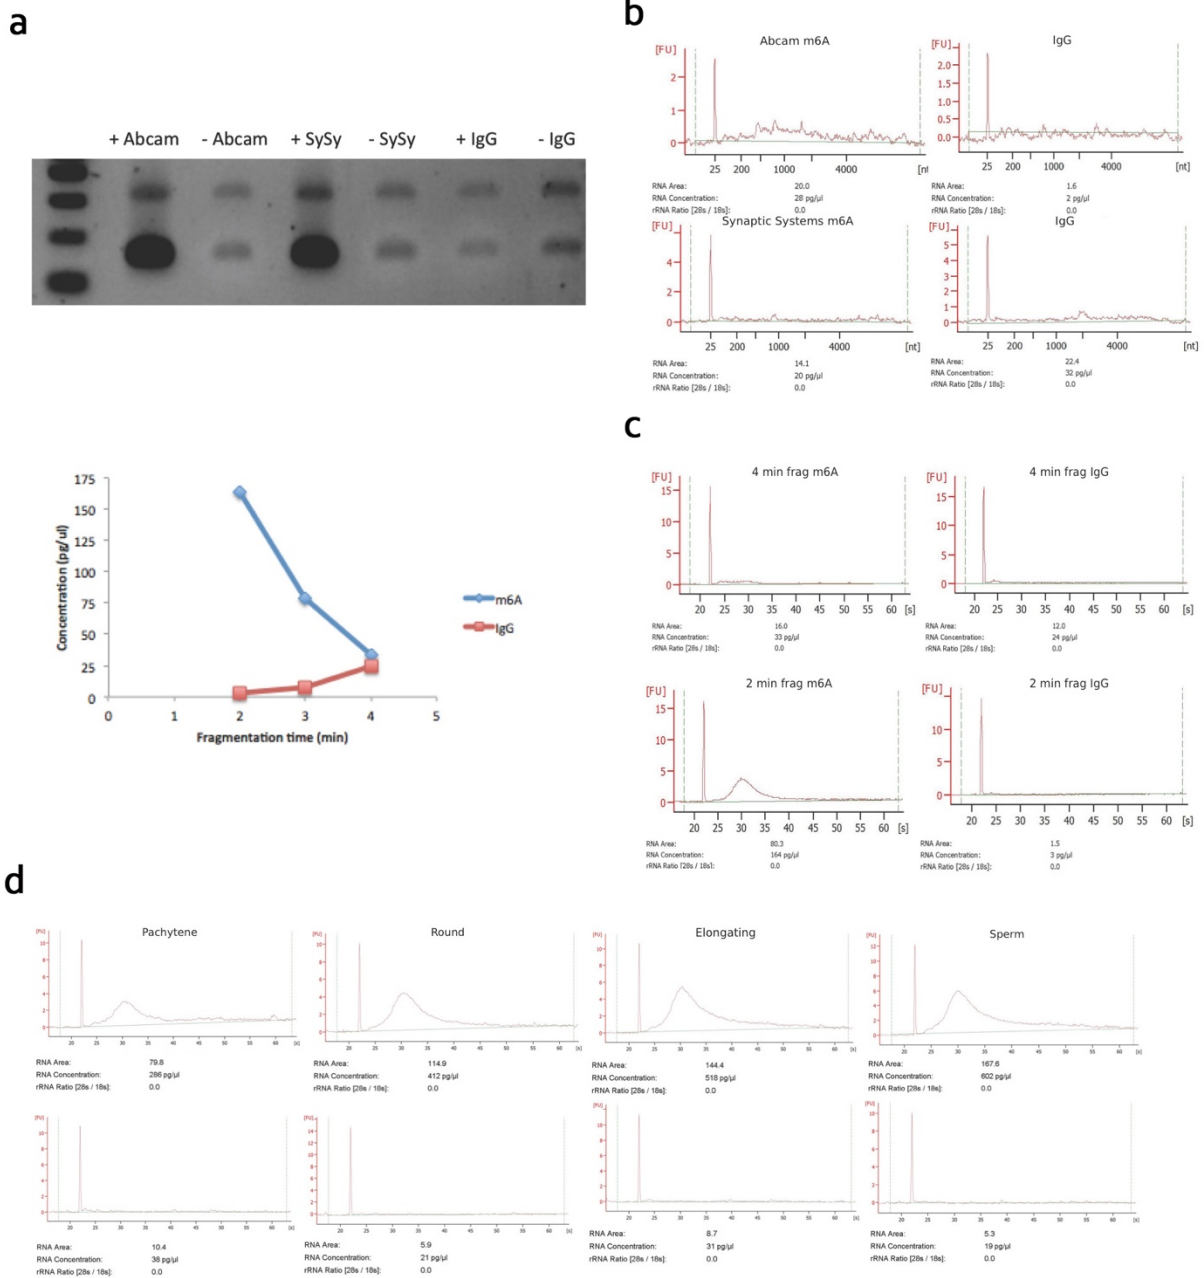

**Fig. S8. Optimization of the m<sup>6</sup>A-RIP-Seq method.** a. Validation of the anti-m<sup>6</sup>A antibodies used. m<sup>6</sup>A-positive and negative RNAs were synthesized (350nt), combined in a 1:1 ratio, immunoprecipitated using the anti-m<sup>6</sup>A antibodies from either Abcam or Synaptic Systems, then digested with BamHI. m<sup>6</sup>A-containing RNAs had a BamHI digestion site incorporated. IgG immunoprecipitation was used as a negative control. b. Agilent profiles of m<sup>6</sup>A-immunoprecipitated total RNA using Abcam or Synaptic Systems antibodies, fragmented for 10 min. Normal rabbit IgG immunoprecipitation was used as a negative control. c, d. Optimization of RNA fragmentation times (2-4 min) followed by m<sup>6</sup>A-immunoprecipitation shown as a graph (s) and Agilent profiles (d). e. Immunoprecipitation results from large RNA from spermatids fragmented for 2 minutes. Top row: m<sup>6</sup>A. Bottom row: IgG.

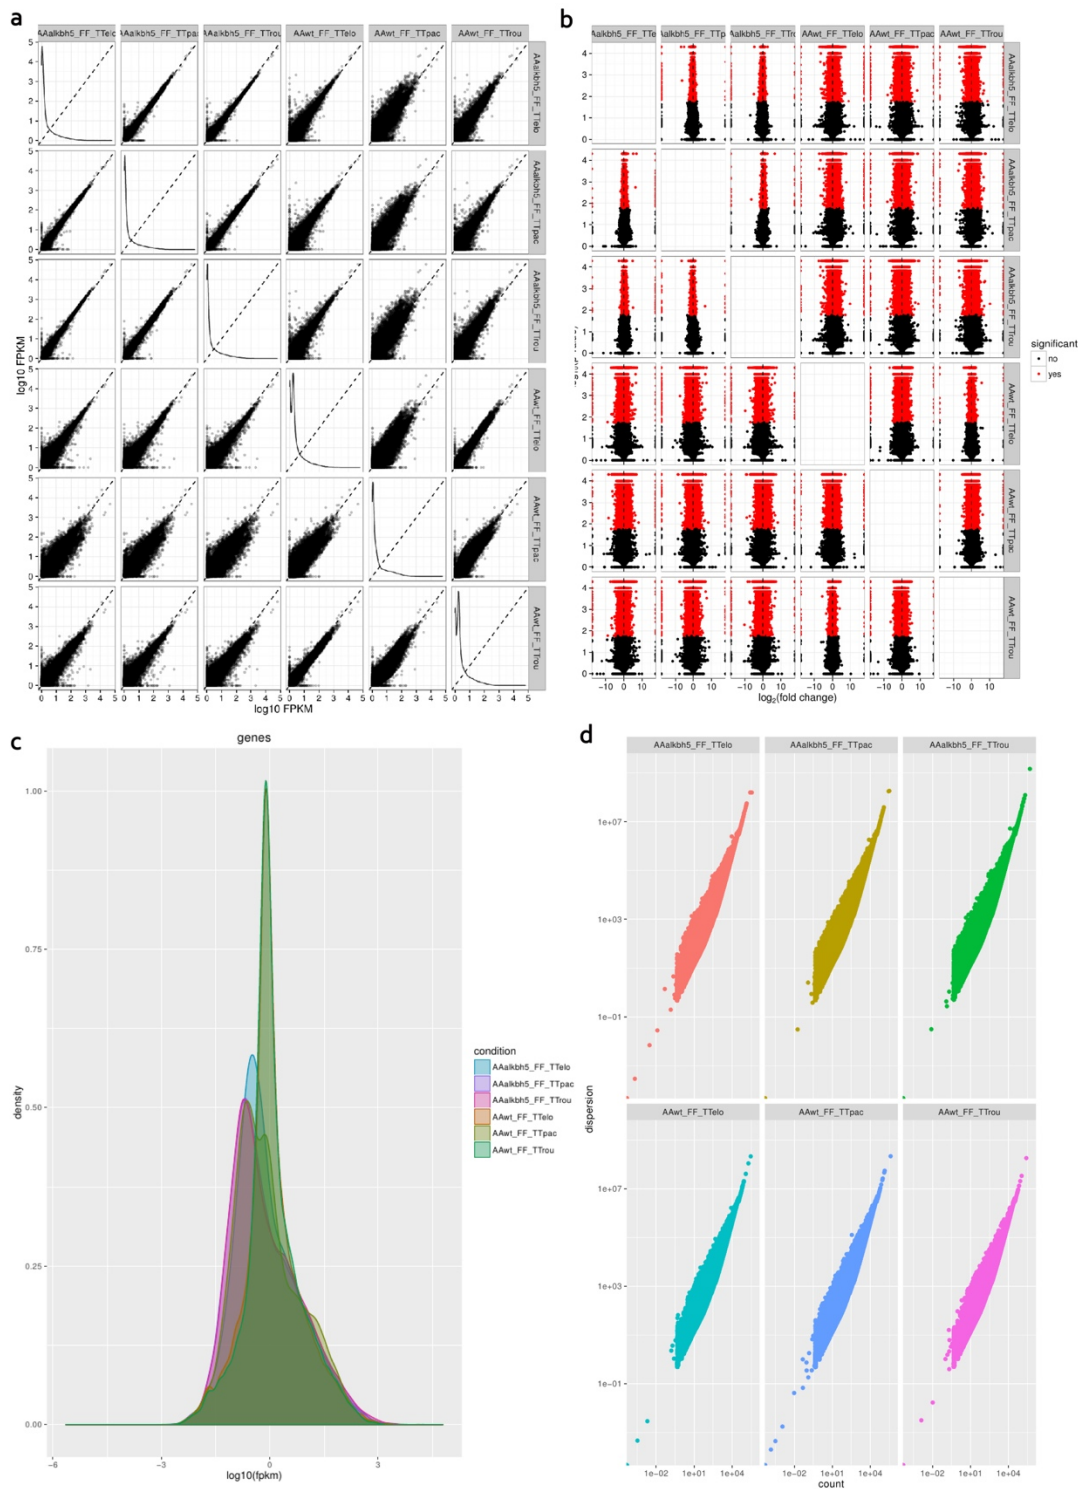

**Fig. S9. Evaluation of the quality of the RNA-Seq data generated in this study.** a. Pairwise scatterplots of the log<sub>10</sub> normalized FPKM scores across all six RNA samples. b. Volcano plots showing the log<sub>10</sub>(p-value) in y-axis and log<sub>2</sub>(fold change) in x-axis by pairwise comparison across all six RNA samples. c. Density plots showing the distribution of log<sub>10</sub> normalized FPKM scores across biological replicates of all six RNA samples. d. Overdispersion plots demonstrating the estimated overdispersion for each sample as a quality control measure.

| Filename              | Sequencing_depth | Mapping_ratio             |
|-----------------------|------------------|---------------------------|
| AAwt-FF-TTrou-SS1     | 34735112         | 33442268 (96.3% of input) |
| AAalkbh5-FF-TTrou-SS1 | 38024748         | 36154779 (95.1% of input) |
| AAwt-FF-TTelo-SS2     | 32836366         | 31676981 (96.5% of input) |
| AAwt-FF-TTelo-SS1     | 36664543         | 35392210 (96.5% of input) |
| AAalkbh5-FF-TTpac-SS2 | 29271271         | 27864562 (95.2% of input) |
| AAalkbh5-FF-TTpac-SS1 | 34920033         | 33202198 (95.1% of input) |
| AAalkbh5-FF-TTelo-SS1 | 28998202         | 27622759 (95.3% of input) |
| AAwt-FF-TTpac-SS1     | 37619674         | 35967874 (95.6% of input) |
| AAwt-FF-TTrou-SS2     | 31757348         | 30593614 (96.3% of input) |
| AAwt-FF-TTpac-SS2     | 36056407         | 34486666 (95.6% of input) |
| AAalkbh5-FF-TTrou-SS2 | 31337681         | 29924225 (95.5% of input) |
| AAalkbh5-FF-TTelo-SS2 | 37342745         | 35523803 (95.1% of input) |

**Fig. S10. Sequencing depth and mapping rate of RNA-Seq analyses.**

**Table S1. Dysregulated splicing factor genes in Alkbh5 KO spermatogenic cells.**

| Gene symbol    | Gene name                                                                                    | Function                                                                                                    |
|----------------|----------------------------------------------------------------------------------------------|-------------------------------------------------------------------------------------------------------------|
| <i>Sfswap</i>  | Splicing factor, suppressor of white-apricot homolog;Sfswap;ortholog                         | mRNA splicing factor(PC00148)                                                                               |
| <i>U2af2</i>   | Splicing factor U2AF 65 kDa subunit;U2af2;ortholog                                           |                                                                                                             |
| <i>Srsf1</i>   | Serine/arginine-rich splicing factor 1;Srsf1;ortholog                                        |                                                                                                             |
| <i>Khdrbs3</i> | KH domain-containing, RNA-binding, signal transduction-associated protein 3;Khdrbs3;ortholog | mRNA splicing factor(PC00148);transcription cofactor(PC00217)                                               |
| <i>Cdk12</i>   | Cyclin-dependent kinase 12;Cdk12;ortholog                                                    | non-receptor serine/threonine protein kinase(PC00167);non-receptor tyrosine protein kinase(PC00168)         |
| <i>Son</i>     | Protein SON;Son;ortholog                                                                     |                                                                                                             |
| <i>Snrnp70</i> | U1 small nuclear ribonucleoprotein 70 kDa;Snrnp70;ortholog                                   | mRNA splicing factor(PC00148)                                                                               |
| <i>Brdt</i>    | Bromodomain testis-specific protein;Brdt;ortholog                                            |                                                                                                             |
| <i>Hnrnpl</i>  | Heterogeneous nuclear ribonucleoprotein L;Hnrnpl;ortholog                                    |                                                                                                             |
| <i>Celf5</i>   | CUGBP, Elav-like family member 5;Celf5;ortholog                                              |                                                                                                             |
| <i>Tra2b</i>   | Transformer-2 protein homolog beta;Tra2b;ortholog                                            | mRNA splicing factor(PC00148)                                                                               |
| <i>Srek1</i>   | Splicing regulatory glutamine/lysine-rich protein 1;Srek1;ortholog                           | RNA binding protein(PC00031)                                                                                |
| <i>Zfp326</i>  | DBIRD complex subunit ZNF326;Znf326;ortholog                                                 |                                                                                                             |
| <i>Sf3a1</i>   | Splicing factor 3A subunit 1;Sf3a1;ortholog                                                  | mRNA splicing factor(PC00148)                                                                               |
| <i>Hnrnpk</i>  | Heterogeneous nuclear ribonucleoprotein K;Hnrnpk;ortholog                                    | enzyme modulator(PC00095);mRNA splicing factor(PC00148);ribonucleoprotein(PC00201);serine protease(PC00203) |
| <i>Ddx17</i>   | Probable ATP-dependent RNA helicase DDX17;Ddx17;ortholog                                     |                                                                                                             |
| <i>Tmbim6</i>  | Bax inhibitor 1;Tmbim6;ortholog                                                              |                                                                                                             |
| <i>Rbm25</i>   | RNA-binding protein 25;Rbm25;ortholog                                                        |                                                                                                             |

**Table S2. Dysregulated ciliogenic genes in Alkbh5 KO spermatogenic cells.**

| <b>Gene symbol</b> | <b>Gene name</b>                                           | <b>Function</b>                                               |
|--------------------|------------------------------------------------------------|---------------------------------------------------------------|
| <i>Lca5</i>        | Lebercilin;Lca5;ortholog                                   |                                                               |
| <i>C2cd3</i>       | C2 domain-containing protein 3;C2cd3;ortholog              |                                                               |
| <i>Foxj1</i>       | Forkhead box protein J1;Foxj1;ortholog                     |                                                               |
| <i>Nek1</i>        | Serine/threonine-protein kinase Nek1;Nek1;ortholog         |                                                               |
| <i>Hydin</i>       | Hydrocephalus-inducing protein;Hydin;ortholog              |                                                               |
| <i>Dnaaf3</i>      | Dynein assembly factor 3, axonemal;Dnaaf3;ortholog         |                                                               |
| <i>Cfap126</i>     | Protein Flattop;Cfap126;ortholog                           |                                                               |
| <i>Ttll8</i>       | Protein monoglycylase TLL8;Ttll8;ortholog                  |                                                               |
| <i>Ube2b</i>       | Ubiquitin-conjugating enzyme E2 B;Ube2b;ortholog           |                                                               |
| <i>Ttc21a</i>      | Tetratricopeptide repeat protein 21A;Ttc21a;ortholog       |                                                               |
| <i>Cep89</i>       | Centrosomal protein of 89 kDa;Cep89;ortholog               |                                                               |
| <i>Ttll3</i>       | Tubulin monoglycylase TLL3;Ttll3;ortholog                  |                                                               |
| <i>Dnah7a</i>      | Dynein, axonemal, heavy chain 7A;Dnah7a;ortholog           | hydrolase(PC00121);microtubule binding motor protein(PC00156) |
| <i>Traf3ip1</i>    | TRAF3-interacting protein 1;Traf3ip1;ortholog              |                                                               |
| <i>Rfx4</i>        | Transcription factor RFX4;Rfx4;ortholog                    | winged helix/forkhead transcription factor(PC00246)           |
| <i>Ttc26</i>       | Intraflagellar transport protein 56;Ttc26;ortholog         |                                                               |
| <i>Pcnt</i>        | Pericentrin;Pcnt;ortholog                                  |                                                               |
| <i>Ttc21b</i>      | Tetratricopeptide repeat protein 21B;Ttc21b;ortholog       |                                                               |
| <i>Wdr60</i>       | WD repeat-containing protein 60;Wdr60;ortholog             | microtubule family cytoskeletal protein(PC00157)              |
| <i>Ift80</i>       | Intraflagellar transport protein 80 homolog;ift80;ortholog |                                                               |
| <i>Actr2</i>       | Actin-related protein 2;Actr2;ortholog                     |                                                               |
| <i>Ccdc114</i>     | Coiled-coil domain-containing protein 114;Ccdc114;ortholog |                                                               |
| <i>Ccdc63</i>      | Coiled-coil domain-containing protein 63;Ccdc63;ortholog   |                                                               |
| <i>Sc1t1</i>       | Sodium channel and clathrin linker 1;Sc1t1;ortholog        |                                                               |
| <i>Rab12</i>       | Rab-like protein 2A;Rab12;ortholog                         |                                                               |
| <i>Dnaic1</i>      | Dynein intermediate chain 1, axonemal;Dnai1;ortholog       | microtubule family cytoskeletal protein(PC00157)              |
| <i>Dnah7b</i>      | Dynein, axonemal, heavy chain 7B;Dnah7b;ortholog           | hydrolase(PC00121);microtubule binding motor protein(PC00156) |



Table S3. Dysregulated spermatogenesis genes in *Alkbh5* KO spermatogenic cells.

| Gene symbol        | Gene name                                                                 | Function                                                                                                                                 |
|--------------------|---------------------------------------------------------------------------|------------------------------------------------------------------------------------------------------------------------------------------|
| <i>Catsperb</i>    | Cation channel sperm-associated protein subunit beta;Catsperb;ortholog    |                                                                                                                                          |
| <i>Adcy10</i>      | Adenylate cyclase type 10;Adcy10;ortholog                                 |                                                                                                                                          |
| <i>Sycp2</i>       | Synaptonemal complex protein 2;Sycp2;ortholog                             |                                                                                                                                          |
| <i>Ccr6</i>        | C-C chemokine receptor type 6;Ccr6;ortholog                               |                                                                                                                                          |
| <i>Tdrd12</i>      | Putative ATP-dependent RNA helicase TDRD12;Tdrd12;ortholog                | nuclease(PC00170)                                                                                                                        |
| <i>Stra8</i>       | Stimulated by retinoic acid gene 8 protein;Stra8;ortholog                 |                                                                                                                                          |
| <i>Strbp</i>       | Spermatid perinuclear RNA-binding protein;Strbp;ortholog                  | mRNA processing factor(PC00147)                                                                                                          |
| <i>Ccnyl1</i>      | Cyclin Y-like 1;Ccnyl1;ortholog                                           |                                                                                                                                          |
| <i>Nek1</i>        | Serine/threonine-protein kinase Nek1;Nek1;ortholog                        |                                                                                                                                          |
| <i>Sycp1</i>       | Synaptonemal complex protein 1;Sycp1;ortholog                             |                                                                                                                                          |
| <i>Fanca</i>       | Fanconi anemia group A protein homolog;Fanca;ortholog                     |                                                                                                                                          |
| <i>Capza3</i>      | F-actin-capping protein subunit alpha-3;Capza3;ortholog                   | non-motor actin binding protein(PC00165)                                                                                                 |
| <i>Zfp37</i>       | Zinc finger protein 37;Zfp37;ortholog                                     | KRAB box transcription factor(PC00029)                                                                                                   |
| <i>Grip1,Ncoa2</i> | Nuclear receptor coactivator 2;Ncoa2;ortholog                             | acetyltransferase(PC00038);transcription factor(PC00218)                                                                                 |
| <i>Fancl</i>       | E3 ubiquitin-protein ligase FANCL;Fancl;ortholog                          | ubiquitin-protein ligase(PC00234)                                                                                                        |
| <i>Crem</i>        | cAMP-responsive element modulator;Crem;ortholog                           |                                                                                                                                          |
| <i>Cabyr</i>       | Calcium-binding tyrosine phosphorylation-regulated protein;Cabyr;ortholog |                                                                                                                                          |
| <i>Pum1</i>        | Pumilio homolog 1;Pum1;ortholog                                           | mRNA processing factor(PC00147);translation factor(PC00223)                                                                              |
| <i>Adad1</i>       | Adenosine deaminase domain-containing protein 1;Adad1;ortholog            | DNA binding protein(PC00009);RNA binding protein(PC00031);deaminase(PC00088);defense/immunity protein(PC00090);kinase activator(PC00138) |
| <i>Pax5</i>        | Paired box protein Pax-5;Pax5;ortholog                                    |                                                                                                                                          |
| <i>Ube2b</i>       | Ubiquitin-conjugating enzyme E2 B;Ube2b;ortholog                          |                                                                                                                                          |
| <i>Odf3</i>        | Outer dense fiber protein 3;Odf3;ortholog                                 | structural protein(PC00211)                                                                                                              |
| <i>Sfmbt1</i>      | Scm-like with four MBT domains protein 1;Sfmbt1;ortholog                  | chromatin/chromatin-binding protein(PC00077);transcription factor(PC00218)                                                               |
| <i>Micalcl</i>     | MICAL C-terminal-like protein;Micalcl;ortholog                            |                                                                                                                                          |
| <i>Tex14</i>       | Inactive serine/threonine-protein kinase TEX14;Tex14;ortholog             |                                                                                                                                          |
| <i>Chd5</i>        | Chromodomain-helicase-DNA-binding protein 5;Chd5;ortholog                 |                                                                                                                                          |
| <i>Rara</i>        | Retinoic acid receptor alpha;Rara;ortholog                                | C4 zinc finger nuclear receptor(PC00169);nucleic acid binding(PC00171);receptor(PC00197)                                                 |
| <i>Ctnnb1</i>      | Catenin beta-1;Ctnnb1;ortholog                                            |                                                                                                                                          |
| <i>Tle3</i>        | Transducin-like enhancer protein 3;Tle3;ortholog                          | transcription cofactor(PC00217)                                                                                                          |
| <i>Atat1</i>       | Alpha-tubulin N-acetyltransferase 1;Atat1;ortholog                        |                                                                                                                                          |
| <i>Eif4g3</i>      | Eukaryotic translation initiation factor 4 gamma 3;Eif4g3;ortholog        | translation initiation factor(PC00224)                                                                                                   |
| <i>Prm2</i>        | Protamine-2;Prm2;ortholog                                                 |                                                                                                                                          |
| <i>Spag1</i>       | Sperm-associated antigen 1;Spag1;ortholog                                 |                                                                                                                                          |
| <i>Tgfb1</i>       | TGF-beta receptor type-1;Tgfb1;ortholog                                   | TGF-beta receptor(PC00035);serine/threonine protein kinase receptor(PC00205)                                                             |
| <i>Pacrg</i>       | Parkin coregulated gene protein homolog;Pacrg;ortholog                    |                                                                                                                                          |
| <i>Brc2</i>        | Breast cancer type 2 susceptibility protein homolog;Brc2;ortholog         | damaged DNA-binding protein(PC00086)                                                                                                     |
| <i>Brd1</i>        | Bromodomain testis-specific protein;Brd1;ortholog                         |                                                                                                                                          |
| <i>Odf4</i>        | Outer dense fiber protein 4;Odf4;ortholog                                 |                                                                                                                                          |
| <i>Tbc1d21</i>     | TBC1 domain family member 21;Tbc1d21;ortholog                             | G-protein modulator(PC00022);cysteine protease(PC00081)                                                                                  |
| <i>Abhd2</i>       | Monoacylglycerol lipase ABHD2;Abhd2;ortholog                              | serine protease(PC00203)                                                                                                                 |
| <i>Ednra</i>       | Endothelin-1 receptor;Ednra;ortholog                                      |                                                                                                                                          |
| <i>Ttc26</i>       | Intraflagellar transport protein 56;Ttc26;ortholog                        |                                                                                                                                          |
| <i>Hmga2</i>       | High mobility group protein HMGI-C;Hmga2;ortholog                         | DNA binding protein(PC00009)                                                                                                             |
| <i>Stx2</i>        | Syntaxin-2;Stx2;ortholog                                                  | SNARE protein(PC00034)                                                                                                                   |
| <i>Immp2l</i>      | Mitochondrial inner membrane protease subunit 2;Immp2l;ortholog           |                                                                                                                                          |
| <i>Msh4</i>        | MutS protein homolog 4;Msh4;ortholog                                      | DNA binding protein(PC00009)                                                                                                             |
| <i>Stag3</i>       | Cohesin subunit SA-3;Stag3;ortholog                                       | chromatin/chromatin-binding protein(PC00077)                                                                                             |
| <i>Rnf17</i>       | RING finger protein 17;Rnf17;ortholog                                     |                                                                                                                                          |
| <i>Ccdc63</i>      | Coiled-coil domain-containing protein 63;Ccdc63;ortholog                  |                                                                                                                                          |
| <i>Rab12</i>       | Rab-like protein 2A;Rab12;ortholog                                        |                                                                                                                                          |
| <i>Marf1</i>       | Meiosis arrest female protein 1;Marf1;ortholog                            | RNA binding protein(PC00031)                                                                                                             |
| <i>Arid4b</i>      | AT-rich interactive domain-containing protein 4B;Arid4b;ortholog          | transcription cofactor(PC00217)                                                                                                          |
| <i>Figl1</i>       | Fidgetin-like protein 1;Figl1;ortholog                                    | non-motor microtubule binding protein(PC00166)                                                                                           |
